# Supplementary material
Source: publisher figshare collection journal article supplement (https://gsapubs.figshare.com/ndownloader/files/24850529)
Supplement: Supplementary file 1 [file 24850529]

## Sheet: Sheet1
Supplemental Material for Ashworth, A.C., Thackray, G.D., and Gavin, D.G., 2020, Climate of the Last Glacial Maximum on the western Olympic Peninsula
based on insect paleoecology, palynology, and glacial geology, in Waitt, R.B., Thackray, G.D., and Gillespie, A.R., eds., Untangling the Quaternary Period:
A Legacy of Stephen C. Porter: Geological Society of America Special Paper 548, https://doi.org/10.1130/2020.2548(06).
S2A. South Fork of the Hoh River Assemblage
Taxa	H	P	LE	RE	Other	MNI
Carabidae
Elaphrus clairvillei				2		2
Trechus sp.			2	2		2
Patrobus fossifrons	1	1		1		1
Agonum sp.			1	2		2
Carabidae gen. sp.			1	1		1
Dytiscidae
Hydroporus sp.			6	4		6
Hydroporinae gen. sp.			1	1	1S	1
Agabini gen. sp.			1		1S	1
Hydrophilidae
Laccobius sp.			2			2
Helophorus sp.	1	1				1
Cercyon sp.			3	1		4
Hydrophilidae gen. sp..	2		2	1		2
Staphylinidae
Olophrum consimile	7	25	51	54		54
Olophrum rotundicolle	1	2	1			2
Arpedium sp.			3	4		4
Pycnoglyta sp.			7	12		12
Eusphalerum sp.		1	7	10		10
Oxytelus sp.	1		1	2		2
Tachinus sp.				1		1
Tachyporinae gen. sp.			1			1
Aleocharinae gen. sp.		27	16	27		27
Stenus sp.			32	23		32
Staphylininae gen. sp.	3	1	1	2		3
Scarabaeidae
Aphodiine gen. sp.	2		1	4		4
Byrrhidae
Cytilus sp.	1					1
Byrrhidae gen. sp.				1		1
Elateridae
Hypnoidus sp.		1				1
Brentidae
Apion sp.			9	10		10
Curculionidae
Curculionidae gen. sp.				1	1S	1
Hymenoptera
Chalcidoidea gen. sp.	6					6
Total Individuals						198
H=head(s); P=pronotum(a); LE= left elytron (a); RE=right elytron (a);S=sternite (s)
MNI=minimum number of individuals
